# Supplementary material for: hnRNPDL Phase Separation Is Regulated by Alternative Splicing and Disease-Causing Mutations Accelerate Its Aggregation
Source: PubMed Central journal article supplement — Cell Rep. 2020 Jan 28;30(4):1117–1128.e5. doi: 10.1016/j.celrep.2019.12.080 (PMC6996132; doi:10.1016/j.celrep.2019.12.080), 2020-01-28
Supplement: mmc1.pdf [file mmc1.pdf]

Cell Reports, Volume 30

## Supplemental Information

### **hnRNPD L Phase Separation Is Regulated by Alternative Splicing and Disease-Causing Mutations Accelerate Its Aggregation**

**Cristina Batlle, Peiguo Yang, Maura Coughlin, James Messing, Mireia Pesarrodona, Elzbieta Szulc, Xavier Salvatella, Hong Joo Kim, J. Paul Taylor, and Salvador Ventura**

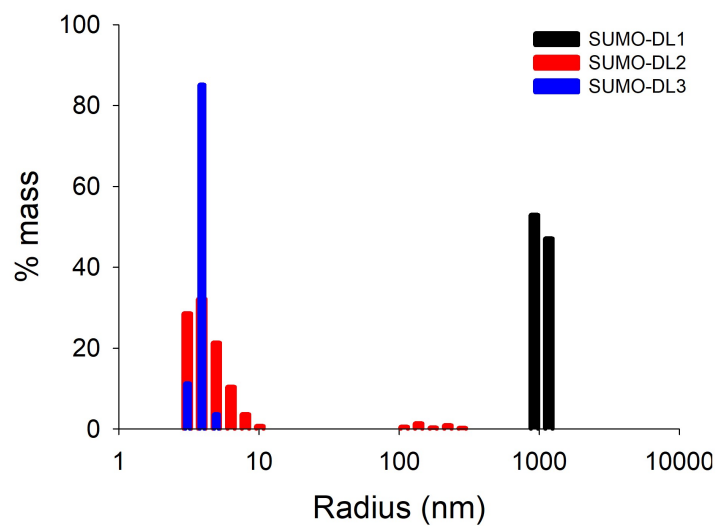

**Figure S1. Dynamic Light Scattering of hnRNPD L isoforms.** Related to Figure 1.

Dynamic Light Scattering (DLS) radius (nm) versus % of mass of hnRNPD L isoforms 1, 2 and 3 (SUMO-DL1, DL2 and DL3 fusions) at 50  $\mu$ M in 50 mM HEPES pH 7.5 and 150 mM NaCl, in the absence of crowding agents.

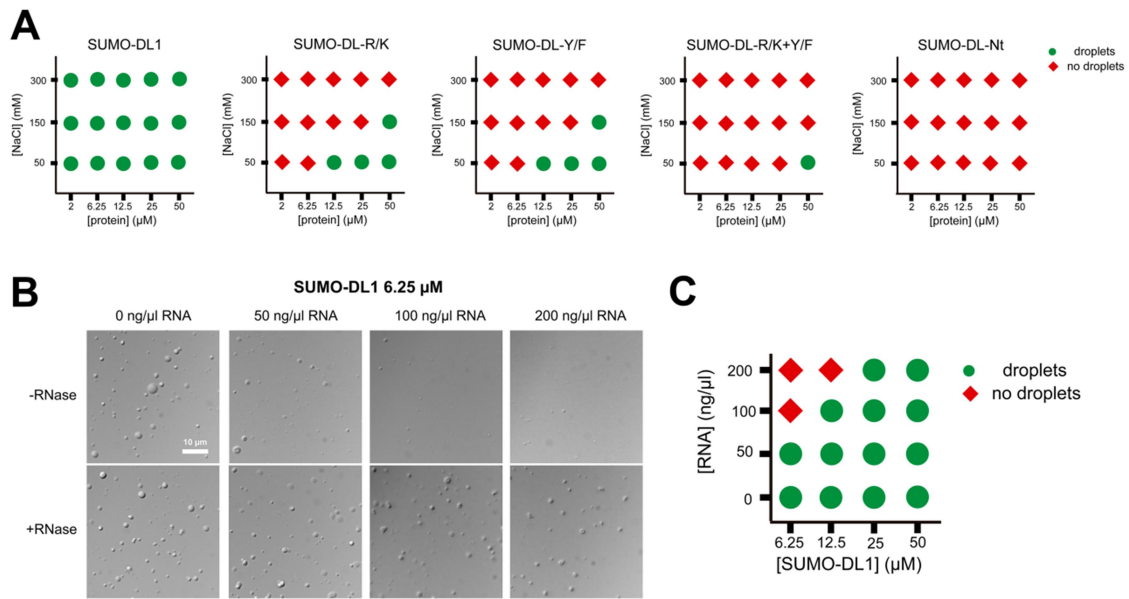

**Figure S2. Liquid-liquid phase separation diagram of hnRNPDL isoform 1 after mutation or RNA addition.** Related to Figure 2 and Figure 3.

A) LLPS diagram of hnRNPDL isoform 1 (SUMO-DL1) and the four hnRNPDL variants: SUMO-DL-R/K, SUMO-DL-Y/F, SUMO-DL-R/K+Y/F and SUMO-DL-Nt, in the absence of crowding agents.

Green circles indicate positive and red diamonds indicate negative for the appearance of droplets at the indicated NaCl/protein concentration combinations.

B) SUMO-hnRNPDL isoform 1 (DL1) LLPS at 6.25  $\mu$ M (366 ng/ $\mu$ l) in the presence of different concentrations of total RNA with or without 5 ng/ $\mu$ l RNase in 50 mM HEPES pH 7.5 and 150 mM NaCl.

C) LLPS diagram of DL1 as a function of protein and RNA concentration in 50 mM HEPES pH 7.5 and 150 mM NaCl. Green circles indicate positive and red diamonds indicate negative for the appearance of droplets at the indicated RNA/protein concentration combinations.

Green circles indicate positive and red diamonds indicate negative for the appearance of droplets at the indicated RNA/protein concentration combinations.

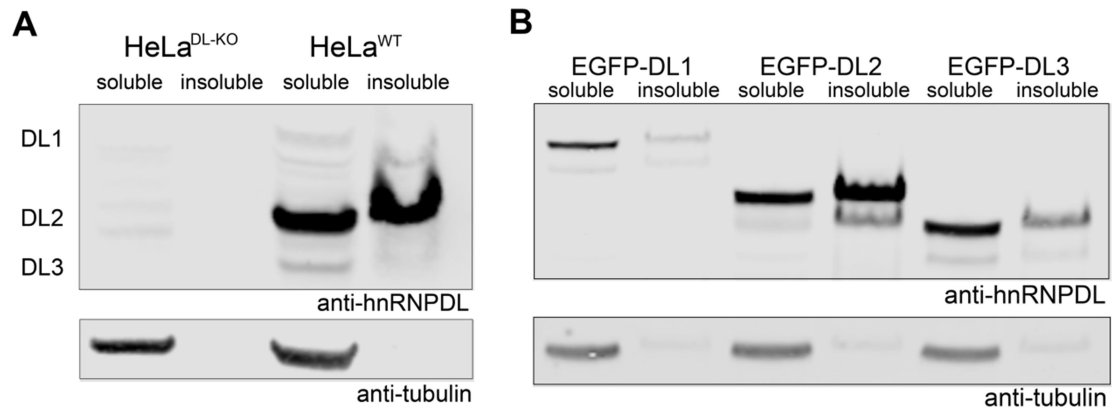

**Figure S3. Endogenous or individual isoforms hnRNPDL solubility analysis after expression in HeLa WT or hnRNPDL KO cells.** Related to Figure 3 and Figure 5.

A) Cell extracts of HeLa hnRNPDL KO (HeLa<sup>DL-KO</sup>) and HeLa WT were processed for soluble examination by Western Blot using an antibody against hnRNPDL protein. Tubulin was blotted as a loading control. B) Cell extracts of HeLa<sup>DL-KO</sup> after EGFP-tagged hnRNPDL isoform 1, 2 or 3 (EGFP-DL1, DL2 and DL3) expression were fractionated and the soluble and insoluble fractions analyzed by Western Blot using an antibody against hnRNPDL protein. Tubulin was blotted as a loading control.

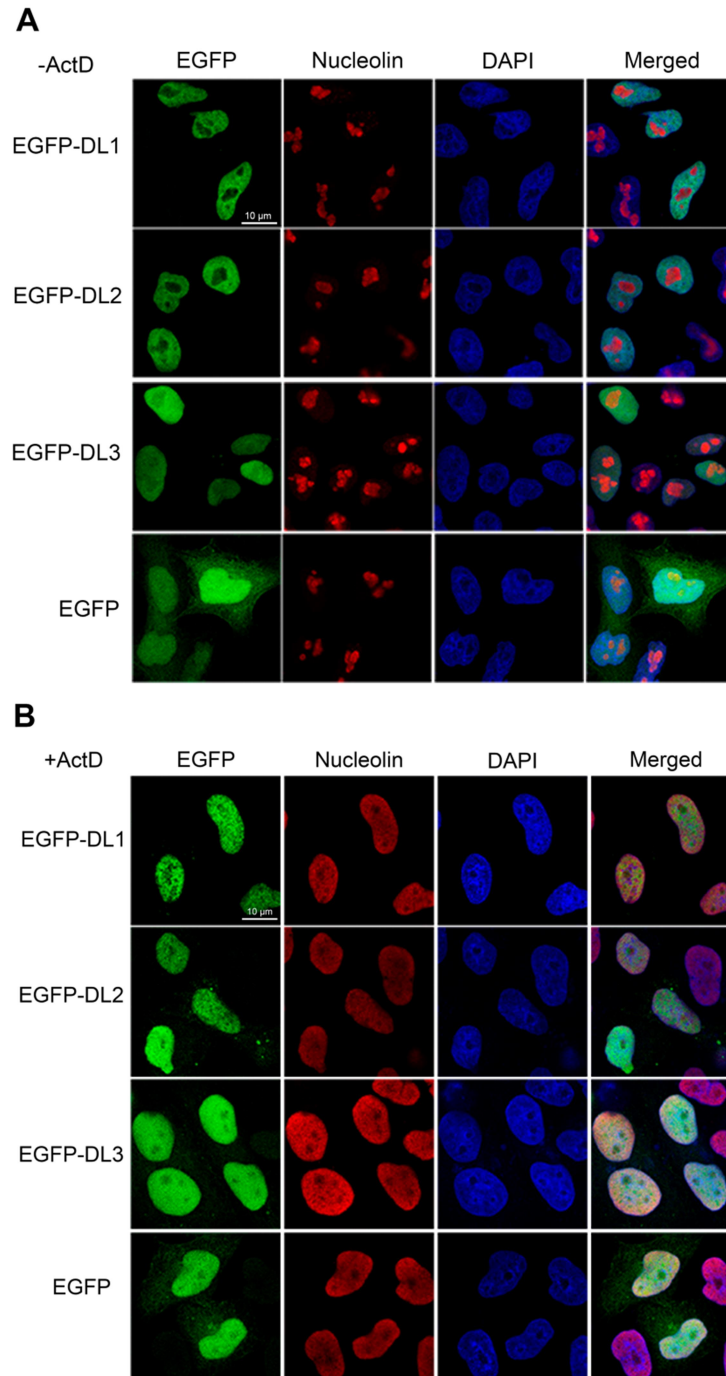

**Figure S4. HnRNPD<sub>L</sub> isoforms localization in HeLa<sup>DL-KO</sup> cells.** Related to Figure 3 and Figure 4. Cellular localization by immunofluorescence of EGFP-hnRNPD<sub>L</sub> isoform 1, 2 and 3 (DL1, DL2, DL3) and unfused EGFP after expression in HeLa<sup>DL-KO</sup> cells in the absence (A) or the presence (B) of actinomycin D. Cells were stained with nucleolin antibody (red) as nucleolus marker and DAPI (blue) as nuclear marker.

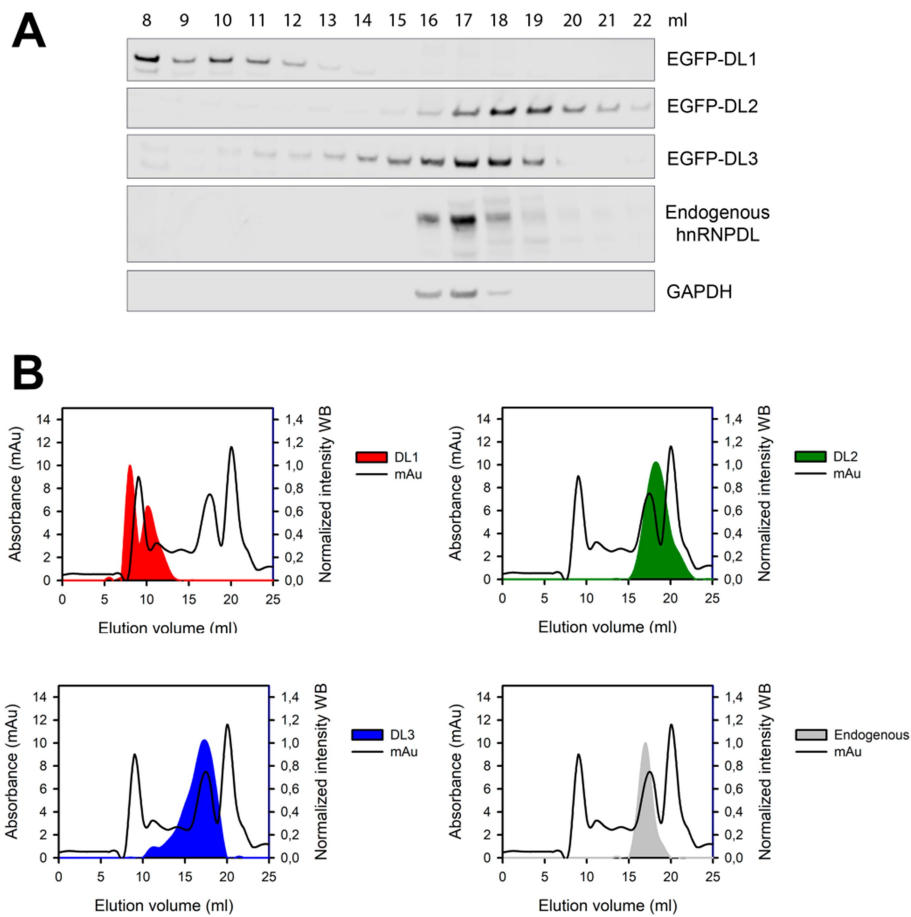

**Figure S5. Elution pattern of cellular hnRNPDL isoforms.** Related to Figure 3.

A) Cell extracts of HeLa<sup>DL-KO</sup> cells after EGFP-tagged hnRNPDL isoform 1, 2 or 3 (EGFP-DL1, DL2 and DL3) expression as well as HeLa WT cells were fractionated by size exclusion chromatography (SEC) and fractions at different elution volumes (ml) were analyzed by Western Blot (WB) using an antibody against hnRNPDL protein. GAPDH was blotted as a loading and molecular weight control. B) WB intensities of EGFP-DL1, DL2 and DL3 and endogenous hnRNPDL were plotted on top of a representative SEC graph of HeLa cells extracts.

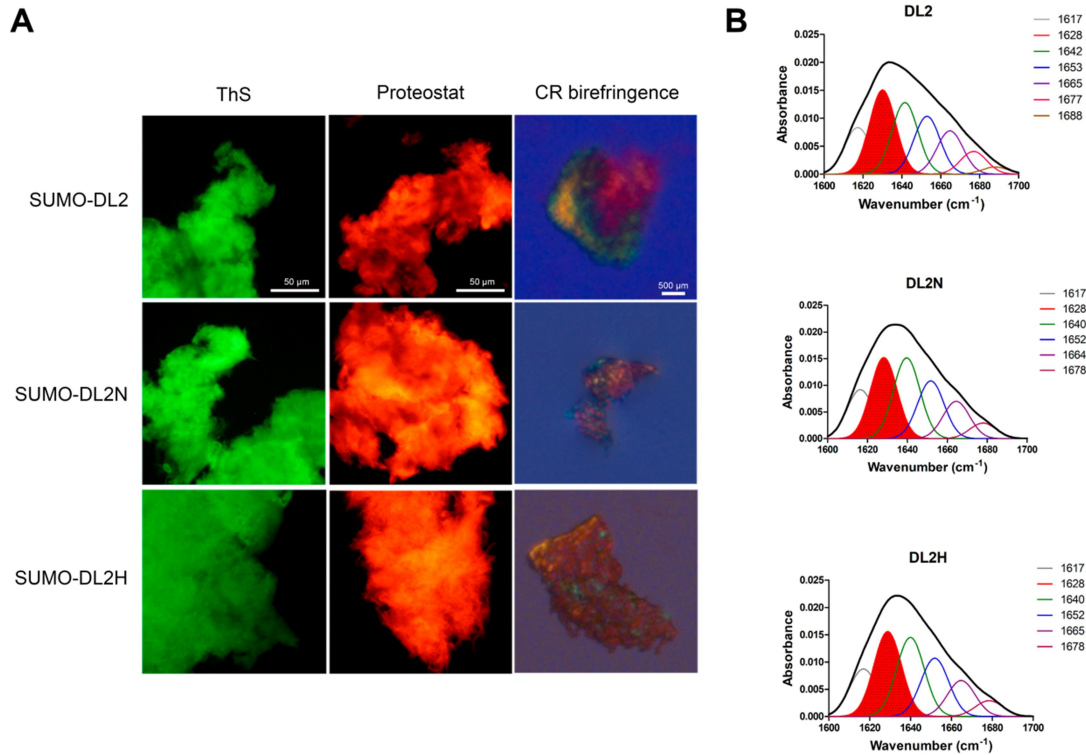

**Figure S6. Amyloid properties of hnRNPD L isoform 2 and disease-causing mutations.** Related to Figure 5 and 6.

A) Thioflavin-S (ThS) staining, Proteostat® staining and Congo Red (CR) birefringence of 4 days incubated 50  $\mu$ M SUMO-hnRNPD L isoform 2 (DL2) and the disease-causing mutations D259N and D259H (DL2N and DL2H) in 50 mM HEPES pH 7.5 and 150 mM NaCl. B) DL2, DL2N and DL2H FTIR absorbance spectrum in the amide I region after aggregation at 50  $\mu$ M in 50 mM HEPES pH 7.5 and 150 mM NaCl. The black line corresponds to the original absorbance spectrum and the red dotted area indicates the contribution of the intermolecular  $\beta$ -sheet signal to the total area upon Gaussian deconvolution. Aggregation was conducted at 37°C and 600 rpm in both A and B.

|           |                                                            |
|-----------|------------------------------------------------------------|
| Human     | YGNYN SAYGG-DQNY S-GYGGY <b>D</b> YTG YNYGNYGYGQGYADYSG 41 |
| Mouse     | YGNYN SAYGG-DQNY S-GYGGY <b>D</b> YTG YNYGNYGYGQGYAD--- 38 |
| Rat       | YGNYN SAYGD-ES--YSGYGGY <b>D</b> YTG YNYGSYGYGQGYTD--- 37  |
| Chicken   | YGNYN SAYSD-QS--YSGYGGY <b>D</b> YSGYNYPNYGYGPGYTD--- 37   |
| Xenopus   | YGSYGNNGSYADQGYNNSYSGY <b>D</b> YSGYNYGSYGYNQGYTD--- 40    |
| Zebrafish | GQNYGGGYGNGYNQGYNGYSGY <b>D</b> YSGYNYQNYGYGQGYDD--- 40    |
|           | .*. . . . . *.*****:***** .****. ** *                      |

**Figure S7. HnRNPD L exon 6 alignment in vertebrates.** Related to Figure 6.

hnRNPD L exon 6 alignment between human, mouse, rat, chicken, xenopus and zebrafish organisms using Clustal Omega. Asp disease-causing mutation is in red.



| Rosetta energy (kcal/mol)            | DL2   | DL2N  | DL2H  |
|--------------------------------------|-------|-------|-------|
| Average six hexapeptides             | -19.4 | -20.7 | -21.2 |
| Maximum scored hexapeptide<br>GGYDYT | -20.7 | -22.4 | -22.2 |

**Table S1. ZipperDB analysis of hnRNPD L isoform 2 and disease-causing mutations.** Related to Figure 6.

ZipperDB analysis of hnRNPD L isoform 2 and the disease-causing mutations D259N and D259H (position 378 in hnRNPD L isoform 1) (DL2N and DL2H). The average of the Rosetta energy for the 6 possible hexapeptides containing the Asp mutated residue and the hexapeptide with the highest score are presented in the table.

| SUMO-DL2 |        | SUMO-DL2N |        | SUMO-DL2H |        |
|----------|--------|-----------|--------|-----------|--------|
| Peak     | % area | Peak      | % area | Peak      | % area |
| 1617     | 13.99  | 1617      | 15.24  | 1617      | 14.78  |
| 1628     | 25.23  | 1628      | 25.23  | 1628      | 26.39  |
| 1642     | 21.45  | 1640      | 25.12  | 1640      | 24.59  |
| 1653     | 17.36  | 1652      | 17.98  | 1652      | 18.13  |
| 1665     | 13.00  | 1664      | 11.60  | 1665      | 11.19  |
| 1677     | 6.82   | 1678      | 4.83   | 1678      | 4.93   |
| 1688     | 2.15   |           |        |           |        |

**Table S2. Secondary structure content of hnRNPD L isoform 2 and disease-causing mutations aggregates.** Related to Figure 6 and Figure S6.

Position and relative area of spectral components in the amide I region of the FTIR absorbance spectrum for the aggregated hnRNPD L isoform 2 and the disease-causing mutations D259N and D259H (DL2N and DL2H).

| <b>Bacteria primers</b>  | <b>Primers 5' → 3'</b>                                                                                                                                                                                                                                                                                                                                                                                                                        |
|--------------------------|-----------------------------------------------------------------------------------------------------------------------------------------------------------------------------------------------------------------------------------------------------------------------------------------------------------------------------------------------------------------------------------------------------------------------------------------------|
| SUMO-DL1_F               | CGCGAACAGATTGGAGGTGAAGTCCC GCCCGTCTG                                                                                                                                                                                                                                                                                                                                                                                                          |
| SUMO-DL1_R               | GTGGCGGCCGCTCTATTAGTACGGTTGATAATTGTT                                                                                                                                                                                                                                                                                                                                                                                                          |
| SUMO-DL2_F               | GAAGACATGAACGAATACAGC                                                                                                                                                                                                                                                                                                                                                                                                                         |
| SUMO-DL2_R               | ACCTCCAATCTGTTTCGCGGTG                                                                                                                                                                                                                                                                                                                                                                                                                        |
| SUMO-DL3_F               | CAAAGCACGTACGGTAAAGCAAG                                                                                                                                                                                                                                                                                                                                                                                                                       |
| SUMO-DL3_R               | CTGACCACGGCCGCGACCACG                                                                                                                                                                                                                                                                                                                                                                                                                         |
| SUMO-DL2N_F              | AACTACACCGGCTATAACTAC                                                                                                                                                                                                                                                                                                                                                                                                                         |
| SUMO-DL2N_R              | ATAACCGCCGTAACCGCTATAG                                                                                                                                                                                                                                                                                                                                                                                                                        |
| SUMO-DL2H_F              | CACTACACCGGCTATAACTAC                                                                                                                                                                                                                                                                                                                                                                                                                         |
| SUMO-DL2H_R              | ATAACCGCCGTAACCGCTATAG                                                                                                                                                                                                                                                                                                                                                                                                                        |
| SUMO-DL1R/K_F            | GAAGACATGAACGAATACAGC                                                                                                                                                                                                                                                                                                                                                                                                                         |
| SUMO-DL1R/K_R            | ACCTCCAATCTGTTTCGCGGTG                                                                                                                                                                                                                                                                                                                                                                                                                        |
| SUMO-DL1-Y/F_F           | CAAAGCACGTACGGTAAAGC                                                                                                                                                                                                                                                                                                                                                                                                                          |
| SUMO-DL1-Y/F_R           | CTGACCACGGCCGCGACCACGGGT                                                                                                                                                                                                                                                                                                                                                                                                                      |
| SUMO-DL-Nt_F             | TAATAGAGCGGCCGCCACCGCT                                                                                                                                                                                                                                                                                                                                                                                                                        |
| SUMO-DL-Nt_R             | CATCGTGACGCTCGAATCTG                                                                                                                                                                                                                                                                                                                                                                                                                          |
| <b>Mammalian primers</b> | <b>Primers 5' → 3'</b>                                                                                                                                                                                                                                                                                                                                                                                                                        |
| EGFP-C3-DL1_F            | GTA CT CAGATCTCGAGCTCAAGCTTATGGAGGTCCC GCCCAGGCTTTC                                                                                                                                                                                                                                                                                                                                                                                           |
| EGFP-C3-DL1_R            | CAGTTATCTAGATCCGGTGGATCCTTAGTATGGCTGGTAATTGTTT                                                                                                                                                                                                                                                                                                                                                                                                |
| EGFP-C3-DL2_F            | GAGGATATGAACGAGTACAGC                                                                                                                                                                                                                                                                                                                                                                                                                         |
| EGFP-C3-DL2_R            | AAGCTTGAGCTCGAGATCTGAG                                                                                                                                                                                                                                                                                                                                                                                                                        |
| EGFP-C3-DL3_F            | CAGAGCACTTATGGCAAGGCATC                                                                                                                                                                                                                                                                                                                                                                                                                       |
| EGFP-C3-DL3_R            | CTGACCTCGGCCACGACCCCTC                                                                                                                                                                                                                                                                                                                                                                                                                        |
| EGFP-C3-DL2N_F           | AATTATACTGGGTATAACTATG                                                                                                                                                                                                                                                                                                                                                                                                                        |
| EGFP-C3-DL2N_R           | ATATCCGCCATAGCCACTATAG                                                                                                                                                                                                                                                                                                                                                                                                                        |
| EGFP-C3-DL2H_F           | CATTATACTGGGTATAACTATG                                                                                                                                                                                                                                                                                                                                                                                                                        |
| EGFP-C3-DL2H_R           | ATATCCGCCATAGCCACTATAG                                                                                                                                                                                                                                                                                                                                                                                                                        |
| <b>DNA fragments</b>     | <b>Primers 5' → 3'</b>                                                                                                                                                                                                                                                                                                                                                                                                                        |
| DNA fragment R/K         | CACCGCGAACAGATTGGAGGTGAAGTCCC GCCGAAACTGAGTCATGTCCC GC<br>CGCCGCTGTTCCC GAGCGCACCGGCAACCCTGGCAAGCAAGAGCCTGTCGCA<br>CTGGAAGCCGAAACCGCCGAAACAGCTGGCACCGCTGCTGCCGTCCCTGGCC<br>CCGAGCTCTGCAAAGCAGGGCGCTAAGAAAGCGCAAAAGCATGTTACCGCAC<br>AGCAACCGAGTAAACTGGCAGGCGGTGCGGCCATTAAAGGCGGTAAAGAAGAA<br>GAAACCGGACCTGTTTAAGAAACATTTCAAAGTTCTCAATCCAGAAGAGC<br>GCAGCTGCGGCCGAGCTACCAAGACGGCTAAACAGCACCCGCCGCGCAGATT<br>CGAGCGTCACGATGGAAGACATGAACGAATACAGC |
| DNA fragment Y/F         | ACCCGTGGTTCGCGGCCGTGGTCAGGGCCAAA ACTGGAACCAGGGTTTCAACA<br>ACTTCTTCGATCAAGGTTTTCGGCAACTTCAATTCGGCGTTTTGGCGGTGATCA<br>GAAC TTTAGCGGTTTTCGGCGGTTTTGACTTCACCGGCTTTAACTTCGGTAAT<br>TTTGGTTTTCGGCCAGGGTTTTGCCGATTTCTCGGGCCAGCAAAGCACGTACG<br>GTAAAGC                                                                                                                                                                                                |

**Table S3. List of the primers used in this study.** Related to STAR Methods.

The source of all the primers is from this study and there is no identifier.
